# Supplementary material for: The Expression and Secretion Profile of TRAP5 Isoforms in Gaucher Disease
Source: MDPI journal article supplement (doi:10.3390/cells13080716), 2024-04-20
Supplement: s1 [file s1]

Supplementary Materials

# The Expression and Secretion Profile of TRAP5 Isoforms in Gaucher Disease

Supplemental Table 1. Demographics, genotypes, and clinical characteristics of bone disease in patients with GD at the time of the study partially have been previously published [18, 21]. GD, Gaucher disease; ERT, enzyme replacement therapy; SRT, substrate reduction therapy; EM, Erlenmeyer; AVN, avascular necrosis.

| nt No.                                | Age yrs. | Sex M/F | ERT/SRT duration (yrs.) | Genotype     | Chito nmol/hr/mL | Lyso Gb-1 ng/mL | CCL18 ng/mL | Bone Pain | Bone marrow infiltration | EM-flask deformity | Pathologic fractures/ Bone surgery | AVN |
|---------------------------------------|----------|---------|-------------------------|--------------|------------------|-----------------|-------------|-----------|--------------------------|--------------------|------------------------------------|-----|
| <b>No bone complication. Total 11</b> |          |         |                         |              |                  |                 |             |           |                          |                    |                                    |     |
| P1                                    | 50       | F       | ERT 5-10                | N370S/N370S  | 52               | 2.7             | 60.9        | No        | Yes                      | Yes                | No/No                              | No  |
| P2                                    | 25       | F       | ERT >10                 | L444P/L444P  | 273              | 15.9            | 180.4       | No        | No                       | No                 | No/No                              | No  |
| P3                                    | 18       | F       | ERT 5-10                | N370S/F213I  | 215              | 7.9             | 54.5        | Yes       | Yes                      | Yes                | No/No                              | No  |
| P4                                    | 41       | F       | SRT                     | N370S/R463C  | 160              | 10.9            | 159.4       | No        | Yes                      | Yes                | No/No                              | Yes |
| P5                                    | 29       | F       | SRT                     | N370S/N370S  | 619              | 6.7             | 75          | No        | No                       | No                 | No/No                              | No  |
| P6                                    | 56       | F       | ERT >10                 | N370S/N370S  | 40               | 1.1             | 41          | Yes       | Yes                      | Yes                | No/No                              | Yes |
| P7                                    | 37       | F       | ERT >10                 | N370S/W381X  | 133              | NA              | 41          | Yes       | Yes                      | No                 | No/No                              | Yes |
| P8                                    | 49       | F       | ERT >10                 | N370S/L444P  | 44               | 4               | 68          | Yes       | Yes                      | No                 | No/Yes                             | Yes |
| P9                                    | 29       | F       | ERT 5-10                | /L444P       | 34               | 7               | 105         | No        | No                       | No                 | No/No                              | No  |
| P10                                   | 21       | M       | SRT                     | N370S/L444P  | 228              | 13.3            | 76          | No        | Yes                      | No                 | No/No                              | No  |
| P11                                   | 33       | M       | ERT 1-5                 | R48Q/L444P   | 1022             | 11              | 1087.9      | Yes       | Yes                      | Yes                | No/No                              | No  |
| <b>Osteopenia (OSN). Total 14</b>     |          |         |                         |              |                  |                 |             |           |                          |                    |                                    |     |
| P12                                   | 29       | F       | ERT 1-5                 | N370S/N370S  | 1104             | 29.6            | 170.1       | No        | Yes                      | Yes                | No/Yes                             | No  |
| P13                                   | 61       | F       | ERT >10                 | N370S/N370S  | 103              | 2.5             | 210.2       | Yes       | Yes                      | Yes                | Yes/No                             | Yes |
| P14                                   | 32       | F       | ERT 5-10                | N370S/L444P  | 127              | 10.7            | 63.1        | No        | No                       | No                 | No/No                              | No  |
| P15                                   | 52       | F       | SRT                     | N370S/N370S  | 42               | 1               | 37.3        | No        | Yes                      | No                 | No/No                              | No  |
| P16                                   | 40       | F       | SRT                     | N370S/R463C  | 5                | 1               | 79.1        | Yes       | Yes                      | No                 | No/No                              | No  |
| P17                                   | 41       | F       | naive                   | N370S/N370S  | 1194             | 49              | 407         | No        | No                       | No                 | Yes/No                             | No  |
| P18                                   | 51       | F       | SRT 5-10                | N370S/L444P  | 314              | 11.7            | 289.2       | No        | No                       | No                 | No/No                              | No  |
| P19                                   | 74       | F       | SRT 1-5                 | N370S/N370S  | 283              | 1.4             | 191         | Yes       | Yes                      | Yes                | No/No                              | No  |
| P20                                   | 38       | F       | ERT >10                 | N370S/N370S  | 110              | 35              | 276         | Yes       | No                       | No                 | No/No                              | No  |
| P21                                   | 61       | F       | 1 year                  | N/A          | 2080             | 375             | 662         | Yes       | No                       | No                 | No/No                              | No  |
| P22                                   | 65       | M       | SRT 5-10                | N370/N370    | 44               | 1.5             | 56.1        | Yes       | Yes                      | No                 | No/No                              | No  |
| P23                                   | 18       | M       | naive                   | N370S/N370S  | 164              | 5.1             | 97.5        | No        | Yes                      | No                 | No/No                              | No  |
| P24                                   | 37       | M       | ERT 1-5                 | N370S/ V394L | 493              | 12              | 103         | Yes       | No                       | No                 | Yes                                | No  |
| P25                                   | 20       | M       | ERT >10                 | L444P/P266A  | 118              | 7.5             | 58.2        | No        | No                       | No                 | No/No                              | No  |
| <b>Osteoporosis (OSR) Total 14</b>    |          |         |                         |              |                  |                 |             |           |                          |                    |                                    |     |
| P26                                   | 57       | F       | SRT 5-10                | L444P/R502C  | 118              | 3.4             | 95.5        | Yes       | Yes                      | Yes                | No/No                              | No  |
| P27                                   | 54       | F       | ERT >10                 | N370S/L444P  | 663              | 129.5           | 131.4       | Yes       | Yes                      | Yes                | No/No                              | Yes |
| P28                                   | 20       | F       | ERT 1-5                 | N370S/L444P  | 665              | 36              | 145.5       | Yes       | No                       | No                 | No/No                              | No  |
| P29                                   | 62       | F       | SRT                     | N370S/N370S  | 7                | 1               | 61.2        | Yes       | Yes                      | Yes                | No/No                              | No  |
| P30                                   | 30       | F       | ERT >10                 | N370S/N370S  | 116              | 17.6            | 120.1       | No        | Yes                      | No                 | No/No                              | No  |
| P31                                   | 63       | F       | naive                   | N370S/R496H  | 38               | 2.5             | 45.7        | Yes       | Yes                      | Yes                | No/No                              | No  |
| P32                                   | 44       | F       | ERT/SRT >10             | L444P/R493C  | 530              | 42.7            | 178.5       | Yes       | Yes                      | No                 | Yes/Yes                            | No  |

|     |    |   |          |             |       |      |       |     |     |     |         |     |
|-----|----|---|----------|-------------|-------|------|-------|-----|-----|-----|---------|-----|
| P33 | 68 | F | ERT 5-10 | N370S/R463C | 63    | 2.5  | 123.8 | Yes | No  | Yes | No/Yes  | Yes |
| P34 | 45 | F | ERT 5-10 | N370S/N370S | 19.96 | 5.4  | 13.8  | Yes | No  | Yes | No/Yes  | No  |
| P35 | 46 | F | SRT      | N370S/N370S | 97.8  | 39   | 331   | Yes | No  | Yes | No      | Yes |
| P36 | 55 | M | SRT 0-1  | N370S/L444P | 376   | 15.2 | 120.2 | Yes | No  | No  | Yes/Yes | No  |
| P37 | 36 | M | ERT >10  | N370S/Y412X | 546   | 85.6 | 562.9 | Yes | Yes | Yes | Yes/Yes | Yes |
| P38 | 39 | M | ERT 5-10 | N370S/N370S | 57    | 39.5 | 836.5 | No  | No  | No  | No/No   | No  |
| P39 | 42 | M | SRT 5-10 | N370S/N370S | 254   | 35.8 | 171   | No  | Yes | No  | No/Yes  | No  |

Supplemental Table 2. The sequences of gene primers that have been used for real-time PCR.

| Gene       | Primers Sequence |                           |
|------------|------------------|---------------------------|
| GAPDH      | Forward          | GAGAGGGCTGGGCTCATTTCGAC   |
|            | Reverse          | CCATCCACAGTCTTCTGGGTGGCAG |
| CCL2/MCP-1 | Forward          | GCAATCAATGCCCCAGTCA       |
|            | Reverse          | TGCTGCTGGTGATTCTTCTATAGCT |
| ACP5       | Forward          | CGTATTCTCTGACCGCTCCC      |
|            | Reverse          | TCTTGAAGTGCAGGCGGTAG      |

Supplemental Table 3. Prevalence of osteopenia and osteoporosis in female and male patients with Gaucher disease by age group. NB – normal bone mineral density, OSN – osteopenia, OSR – osteoporosis.

|                     | Female |     |     | Males |     |     |
|---------------------|--------|-----|-----|-------|-----|-----|
|                     | NB     | OSN | OSR | NB    | OSN | OSR |
| Patients number     | 9      | 10  | 10  | 2     | 4   | 4   |
| Minimum age (Years) | 18     | 29  | 20  | 21    | 18  | 36  |
| Maximum age (Years) | 56     | 74  | 68  | 33    | 65  | 55  |
| Mean age (Years)    | 37     | 48  | 49  | 27    | 35  | 43  |
| Std. Deviation      | 13     | 14  | 15  | 8.5   | 22  | 8.4 |
| Std. Error of Mean  | 4.3    | 4.6 | 4.8 | 6.0   | 11  | 4.2 |
